# Supplementary material
Source: HighWire-hosted journal article supplement (https://bmjopen.bmj.com/content/9/11/e032578)
Supplement: inline-supplementary-material-1 [file inline-supplementary-material-1.pdf]

**Supplementary File 1: Semi-structured interview guide for in-depth interview****Icebreaker*****General questions about the participants***

- How long he/she has been practicing?
  - How many staff in his/her health facilities caring for DM or chronic disease?
1. How is the magnitude of Diabetes Mellitus in the community?
  2. What are the common risk factors of Diabetes Mellitus in Cambodian population?
  3. In your opinion, what are the key factors in controlling Diabetes Mellitus?
  4. How is the service to Diabetes Mellitus diseases given in the country?
  5. In which types of health facilities Diabetes Mellitus services is available?
  6. What are the challenges to provide Diabetes Mellitus services within the existing health care system?
  7. What are the opportunities to provide Diabetes Mellitus services within the existing health care system?
  8. In your opinion, what are the areas needed to improve to manage Diabetes Mellitus better?
  9. In your opinion, what is the best way to improve the health services to manage Diabetes Mellitus effectively?
  10. Is there something you would like to add?
