# Supplementary material
Source: HighWire-hosted journal article supplement (https://bmjopen.bmj.com/content/9/11/e032578)
Supplement: inline-supplementary-material-2 [file inline-supplementary-material-2.pdf]

**Supplementary File 2. Semi-structured interview guide for focus group discussion**

1. Do you know what diabetes mellitus is?
2. Could you please describe about Diabetes Mellitus?
3. Can you tell me when and where did you first seek treatment for these symptoms?
4. Can you tell me about your feeling when you were first diagnosed with Diabetes Mellitus?
5. How do your community perceive Diabetes Mellitus?
6. Can you describe the treatment for Diabetes Mellitus you receive?
7. Can you tell me how was living with Diabetes Mellitus been like for you?
8. How is the service to Diabetes Mellitus diseases given in the country?
9. What are the challenges for you in managing Diabetes Mellitus?
10. What are the opportunities for you in managing Diabetes Mellitus?
11. How do you think how can Diabetes Mellitus management be improved?
12. What advice do you have for people with Diabetes Mellitus?
13. What else would you like to share with me about Diabetes Mellitus?
